# Supplementary material
Source: PubMed Central journal article supplement (PMC2756195)
Supplement: supp_M109.000489_jbc.M109.000489-1.pdf [file supp_M109.000489_jbc.M109.000489-1.pdf]

**Figure S1**

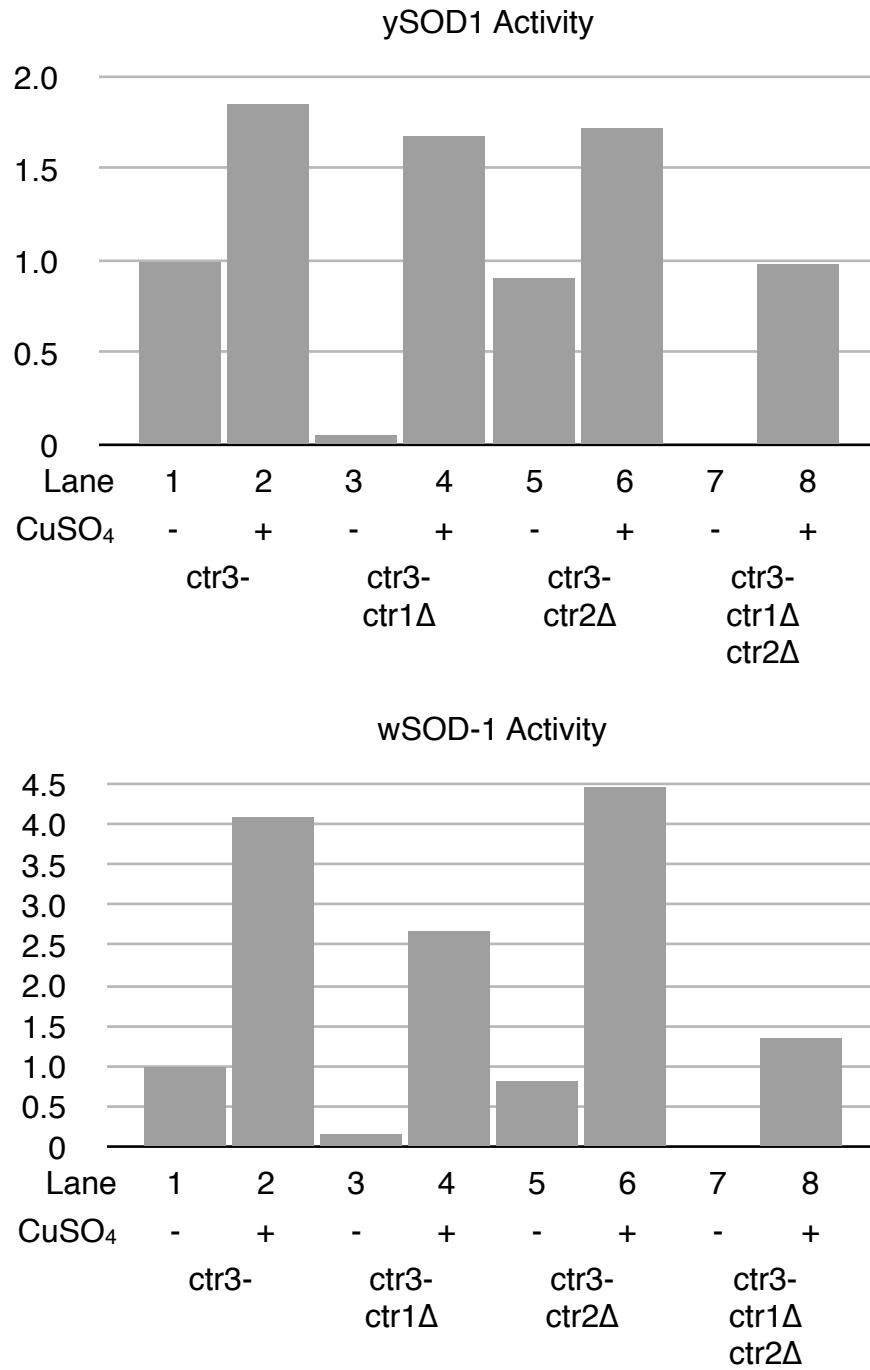

**Figure S1. Densitometric Tracings of superoxide dismutase (SOD) activity gels.** Bands corresponding to ySOD1 and wSOD-1 activity of Figure 1A were scanned by NIH Image J software. Values shown are relative to background and represent the integrated density of pixel intensity and are normalized to lane 1.
