# Supplementary material
Source: PubMed Central journal article supplement (PMC2756195)
Supplement: supp_M109.000489_jbc.M109.000489-2.pdf [file supp_M109.000489_jbc.M109.000489-2.pdf]

Table S1: Yeast SOD1 mutations allowing for suppression of *ccsΔ* lysine auxotrophy.

| Mutation           | Number of CCS Dependent isolates <sup>a</sup> | SOD Activity <sup>b</sup> | CCS Independent SOD Activity <sup>b</sup> | Corresponding Residue in hSOD1 <sup>c</sup> | Corresponding Residue in wSOD-1 <sup>d</sup> |
|--------------------|-----------------------------------------------|---------------------------|-------------------------------------------|---------------------------------------------|----------------------------------------------|
| A35T               | 2                                             | ++++                      | -                                         | K                                           | K                                            |
| A35V               | 2                                             | ++++                      | -                                         | K                                           | K                                            |
| A53V               | 2                                             | ++++                      | -                                         | N                                           | S                                            |
| V113I              | 1                                             | ++++                      | -                                         | I                                           | V                                            |
| V30I               | 2                                             | ++++                      | -                                         | V                                           | I                                            |
| Q2K                | 1                                             | ++++                      | +                                         | K                                           | R                                            |
| Q2R                | 5                                             | ++++                      | +                                         | K                                           | R                                            |
| I108V,P144A        | 1                                             | ++++                      | +++                                       | S, S                                        | Y, A                                         |
| K8R,P144L          | 4                                             | ++++                      | +++                                       | K, S                                        | R, A                                         |
| P144L              | 2                                             | ++++                      | +++                                       | S                                           | A                                            |
| P144Q              | 1                                             | ++++                      | +++                                       | S                                           | A                                            |
| P144S              | 3                                             | ++++                      | +++                                       | S                                           | A                                            |
| V16I, P144L        | 1                                             | ++++                      | +++                                       | I, S                                        | T, A                                         |
| V81A, V113I, P144Q | 1                                             | ++++                      | +++                                       | E, I, S                                     | I, V, A                                      |

<sup>a</sup>Number of times the identical clone was isolated in the library of 10,000 transformants. <sup>b</sup>Relative SOD1 activity as measure by the native gel assay. +++++ and +++ = maximal CCS dependent and independent activity respectively, as seen in Fig. 5A; + = low but detectable activity on SOD gels; “-“ = no detectable activity by the native gel assay, nevertheless these mutants consistently promote lysine independent aerobic growth of *sod1Δ ccs1Δ* mutants. <sup>c,d</sup>Identity of the corresponding residue in human SOD1 or *C. elegans* SOD-1 based on multi-sequence alignments.
